# Supplementary material for: Formation of a Fast Charge Transfer Channel in Quasi-2D Perovskite Solar Cells through External Electric Field Modulation
Source: MDPI journal article supplement (doi:10.3390/en14217402), 2021-11-05
Supplement: s1 [file s1]

## Support Information

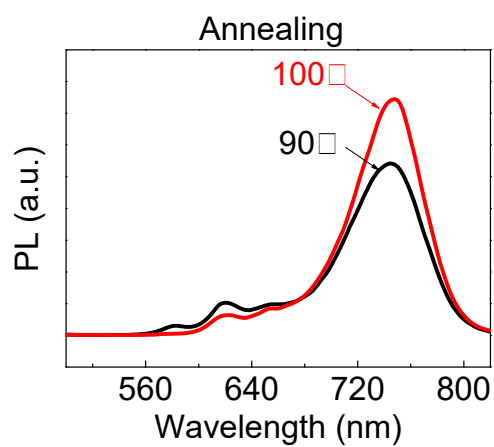

**Figure S1.** Steady state photoluminescence spectra of perovskite films from front sides at different preheating temperatures.

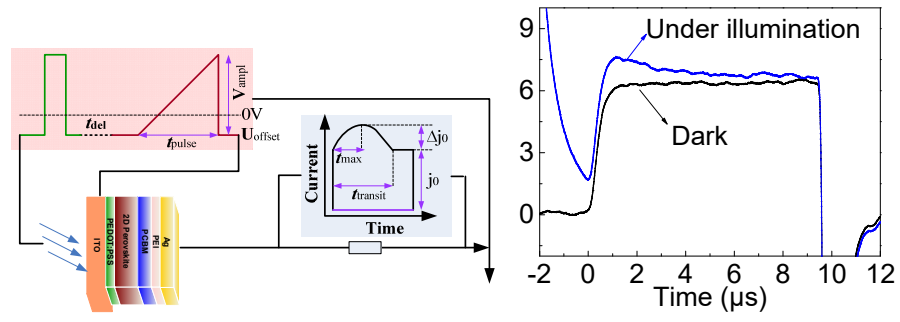

**Figure S2.** Schematic diagram of the CELIV test of perovskite solar cell.
